# Supplementary material for: Assessment of Antidiabetic Activity of the Shikonin by Allosteric Inhibition of Protein-Tyrosine Phosphatase 1B (PTP1B) Using State of Art: An In Silico and In Vitro Tactics
Source: MDPI journal article supplement (doi:10.3390/molecules26133996), 2021-06-30
Supplement: s1 [file s1]

**Table S1: Computational parameters of pharmacokinetics (ADME) of Shikonin pharmacophores as calculated by ADMET Descriptor.**

| Compounds    | Aqueous Solubility | BBB penetration | CYP2D6 Binding | Hepatotoxicity | Intestinal absorption | AlogP  | PSA_2D  |
|--------------|--------------------|-----------------|----------------|----------------|-----------------------|--------|---------|
| ZINC04252531 | 3                  | 4               | FALSE          | FALSE          | 3                     | 1.069  | 160.054 |
| ZINC31154941 | 4                  | 4               | FALSE          | FALSE          | 3                     | -1.851 | 181.428 |
| ZINC35456730 | 3                  | 4               | FALSE          | FALSE          | 3                     | 0.444  | 168.984 |
| ZINC03874669 | 3                  | 4               | FALSE          | FALSE          | 3                     | 0.827  | 180.869 |
| ZINC31157223 | 3                  | 4               | FALSE          | FALSE          | 3                     | 1.08   | 168.984 |
| ZINC13404388 | 3                  | 4               | FALSE          | FALSE          | 3                     | 0.04   | 201.684 |
| ZINC31168395 | 3                  | 4               | FALSE          | TRUE           | 3                     | -0.422 | 213.57  |
| ZINC13404384 | 3                  | 4               | FALSE          | FALSE          | 3                     | 0.04   | 201.684 |
| ZINC37538744 | 3                  | 4               | FALSE          | FALSE          | 3                     | 1.144  | 168.984 |
| ZINC31155964 | 3                  | 4               | FALSE          | FALSE          | 2                     | 3.074  | 142.753 |
| ZINC31155960 | 3                  | 4               | FALSE          | FALSE          | 2                     | 3.074  | 142.753 |
| ZINC31155572 | 3                  | 4               | FALSE          | TRUE           | 3                     | 3.1    | 163.568 |
| ZINC13424696 | 2                  | 4               | FALSE          | FALSE          | 3                     | 0.32   | 222.5   |
| ZINC13404408 | 3                  | 4               | FALSE          | FALSE          | 3                     | -0.202 | 222.5   |
| ZINC35454596 | 4                  | 4               | FALSE          | FALSE          | 3                     | -2.15  | 231.43  |
| ZINC35454599 | 4                  | 4               | FALSE          | FALSE          | 3                     | -2.15  | 231.43  |
| ZINC35454588 | 4                  | 4               | FALSE          | FALSE          | 3                     | -2.15  | 231.43  |
| ZINC35454592 | 4                  | 4               | FALSE          | FALSE          | 3                     | -2.15  | 231.43  |
| ZINC04349223 | 2                  | 4               | FALSE          | TRUE           | 3                     | -0.541 | 231.43  |
| ZINC35455254 | 4                  | 4               | FALSE          | FALSE          | 3                     | -1.762 | 198.729 |
| ZINC35271371 | 3                  | 4               | FALSE          | FALSE          | 3                     | -0.006 | 181.428 |
| ZINC04887566 | 2                  | 4               | FALSE          | TRUE           | 3                     | -0.052 | 248.731 |
| ZINC04887568 | 2                  | 4               | FALSE          | TRUE           | 3                     | -0.052 | 248.731 |
| ZINC35455036 | 3                  | 4               | FALSE          | TRUE           | 3                     | -1.923 | 216.03  |
| ZINC31167460 | 3                  | 4               | FALSE          | TRUE           | 3                     | -0.367 | 185.725 |
| ZINC35464471 | 3                  | 4               | FALSE          | TRUE           | 3                     | -0.367 | 185.725 |
| ZINC31167451 | 3                  | 4               | FALSE          | TRUE           | 3                     | -0.367 | 185.725 |
| ZINC31167448 | 3                  | 4               | FALSE          | TRUE           | 3                     | -0.367 | 185.725 |
| ZINC31167456 | 3                  | 4               | FALSE          | TRUE           | 3                     | -0.367 | 185.725 |
| ZINC67912024 | 3                  | 4               | FALSE          | FALSE          | 3                     | -1.131 | 198.729 |
| ZINC13451185 | 3                  | 4               | FALSE          | FALSE          | 3                     | 0.213  | 211.956 |
| ZINC72320586 | 3                  | 4               | FALSE          | FALSE          | 3                     | -0.504 | 211.956 |
| ZINC72320588 | 3                  | 4               | FALSE          | FALSE          | 3                     | -0.504 | 211.956 |
| ZINC67902596 | 2                  | 4               | FALSE          | FALSE          | 3                     | -3.148 | 261.176 |
| ZINC72320007 | 3                  | 4               | FALSE          | FALSE          | 3                     | -2.058 | 228.475 |
| ZINC35455227 | 3                  | 4               | FALSE          | FALSE          | 3                     | 1.096  | 181.428 |
| ZINC35455235 | 3                  | 4               | FALSE          | FALSE          | 3                     | 1.096  | 181.428 |
| ZINC67912601 | 3                  | 4               | FALSE          | FALSE          | 3                     | -2.148 | 233.331 |

|              |   |   |       |       |   |        |         |
|--------------|---|---|-------|-------|---|--------|---------|
| ZINC67912606 | 3 | 4 | FALSE | FALSE | 3 | -2.148 | 233.331 |
| ZINC67913702 | 4 | 4 | FALSE | FALSE | 3 | -2.405 | 212.515 |
| ZINC35465647 | 3 | 4 | FALSE | FALSE | 3 | 4.253  | 160.054 |
| ZINC72320594 | 3 | 4 | FALSE | FALSE | 3 | -0.513 | 190.358 |
| ZINC72320595 | 3 | 4 | FALSE | FALSE | 3 | -0.513 | 190.358 |
| ZINC72320597 | 3 | 4 | FALSE | FALSE | 3 | -0.513 | 190.358 |
| ZINC72320596 | 3 | 4 | FALSE | FALSE | 3 | -0.513 | 190.358 |
| ZINC67910363 | 3 | 4 | FALSE | FALSE | 3 | -0.199 | 190.358 |
| ZINC38143583 | 3 | 4 | FALSE | FALSE | 3 | -0.448 | 224.96  |
| ZINC38143581 | 3 | 4 | FALSE | FALSE | 3 | -0.448 | 224.96  |
| ZINC85341116 | 3 | 4 | FALSE | FALSE | 3 | -0.448 | 224.96  |
| ZINC38143580 | 3 | 4 | FALSE | FALSE | 3 | -0.448 | 224.96  |
| ZINC67912507 | 3 | 4 | FALSE | FALSE | 3 | -0.525 | 204.145 |
| ZINC67910645 | 4 | 4 | FALSE | FALSE | 3 | -2.532 | 238.746 |
| ZINC85340579 | 2 | 4 | FALSE | TRUE  | 3 | -0.211 | 228.475 |
| ZINC77257082 | 2 | 4 | FALSE | TRUE  | 3 | -1.689 | 257.661 |
| ZINC38139587 | 3 | 4 | FALSE | TRUE  | 3 | 0.517  | 199.289 |
| ZINC67902744 | 2 | 4 | FALSE | FALSE | 3 | -1.317 | 249.29  |
| ZINC67912012 | 3 | 4 | FALSE | FALSE | 3 | -1.987 | 245.776 |
| ZINC33861425 | 2 | 4 | FALSE | FALSE | 3 | 2.144  | 248.731 |
| ZINC67902892 | 2 | 4 | FALSE | TRUE  | 3 | -0.62  | 249.29  |
| ZINC67913374 | 3 | 4 | FALSE | FALSE | 3 | 1.665  | 202.244 |
| ZINC70672772 | 3 | 4 | FALSE | TRUE  | 3 | -0.303 | 224.35  |
| ZINC72320143 | 2 | 4 | FALSE | TRUE  | 3 | 6.988  | 159.494 |
| ZINC72320145 | 2 | 4 | FALSE | TRUE  | 3 | 6.988  | 159.494 |
| ZINC72320142 | 2 | 4 | FALSE | TRUE  | 3 | 6.988  | 159.494 |
| ZINC67903086 | 2 | 4 | FALSE | TRUE  | 3 | -0.657 | 249.29  |
| ZINC59816865 | 2 | 4 | FALSE | TRUE  | 3 | -1.536 | 270.106 |
| ZINC70691533 | 2 | 4 | FALSE | TRUE  | 3 | -1.536 | 270.106 |
| ZINC08234294 | 2 | 4 | FALSE | TRUE  | 3 | -0.657 | 249.29  |
| ZINC67910222 | 3 | 4 | FALSE | FALSE | 3 | 2.215  | 202.244 |
| ZINC08143568 | 2 | 4 | FALSE | TRUE  | 3 | -0.431 | 237.405 |
| ZINC67912005 | 2 | 4 | FALSE | FALSE | 3 | 0.106  | 249.29  |
| ZINC67902708 | 2 | 4 | FALSE | TRUE  | 3 | 5.898  | 180.31  |
| ZINC67902702 | 2 | 4 | FALSE | TRUE  | 3 | 5.898  | 180.31  |
| ZINC38143675 | 2 | 4 | FALSE | FALSE | 3 | -1.334 | 258.22  |
| ZINC38143673 | 2 | 4 | FALSE | FALSE | 3 | -1.334 | 258.22  |
| ZINC38143676 | 2 | 4 | FALSE | FALSE | 3 | -1.334 | 258.22  |
| ZINC38143674 | 2 | 4 | FALSE | FALSE | 3 | -1.334 | 258.22  |
| ZINC67902872 | 2 | 4 | FALSE | FALSE | 3 | 0.484  | 249.29  |
| ZINC49898792 | 2 | 4 | FALSE | FALSE | 3 | 0.484  | 249.29  |

|              |   |   |       |       |   |        |         |
|--------------|---|---|-------|-------|---|--------|---------|
| ZINC08234345 | 2 | 4 | FALSE | FALSE | 3 | 0.484  | 249.29  |
| ZINC67902876 | 1 | 4 | FALSE | FALSE | 3 | -2.046 | 290.921 |
| ZINC67912153 | 2 | 4 | FALSE | FALSE | 3 | -0.726 | 270.106 |
| ZINC49781425 | 1 | 4 | FALSE | TRUE  | 3 | -2.229 | 290.921 |
| ZINC33861449 | 0 | 4 | FALSE | TRUE  | 3 | 0.776  | 299.292 |
| ZINC67910683 | 2 | 4 | FALSE | FALSE | 3 | -1.569 | 267.151 |
| ZINC67910687 | 2 | 4 | FALSE | FALSE | 3 | -1.569 | 267.151 |
| ZINC67910690 | 2 | 4 | FALSE | FALSE | 3 | -1.569 | 267.151 |
| ZINC67902500 | 3 | 4 | FALSE | FALSE | 3 | -0.62  | 243.38  |
| ZINC67911949 | 3 | 4 | FALSE | FALSE | 3 | 1.103  | 239.306 |
| ZINC77269667 | 2 | 4 | FALSE | FALSE | 3 | 1.666  | 257.661 |
| ZINC67910405 | 1 | 4 | FALSE | TRUE  | 3 | 1.567  | 288.188 |
| ZINC67903541 | 2 | 4 | FALSE | TRUE  | 3 | 1.372  | 288.188 |
| ZINC67903538 | 2 | 4 | FALSE | TRUE  | 3 | 1.372  | 288.188 |
| ZINC79210091 | 2 | 4 | FALSE | TRUE  | 3 | 1.507  | 263.007 |
| ZINC79210094 | 2 | 4 | FALSE | TRUE  | 3 | 1.507  | 263.007 |
| ZINC67902657 | 2 | 4 | FALSE | FALSE | 3 | 0.256  | 261.735 |
