# Supplementary material for: Assessment of Antidiabetic Activity of the Shikonin by Allosteric Inhibition of Protein-Tyrosine Phosphatase 1B (PTP1B) Using State of Art: An In Silico and In Vitro Tactics
Source: MDPI journal article supplement (doi:10.3390/molecules26133996), 2021-06-30
Supplement: s1 [file s1]

**Table S2: Computed computational values for Shikonin and its pharamacophores using Biovia Discovery Studio version 4.5**

| Compounds    | Carcinogenic<br>potency<br>TD50_Mouse<br>(mg/kg body<br>weight/day) | Carcinogenic<br>potency<br>TD50_Rat<br>(mg/kg body<br>weight/day) | Ames<br>mutagenicity | Develop<br>mental<br>toxicity<br>potential | Rate of<br>Oral<br>LD50<br>(g/kg<br>body<br>weight) | Rat<br>maximum<br>tolerated<br>dose (g/kg<br>body<br>weight) | Rat<br>inhalation<br>LC50<br>(mg/m3/h) | Rat<br>chronic<br>LOEAL<br>(g/kg<br>body<br>weight) | Skin<br>irritancy | Ocular<br>irritancy | Aerobic<br>biodegrad<br>ability | Fathead<br>minnow<br>LC50 (g/L) | Daphnia<br>_EC50 |
|--------------|---------------------------------------------------------------------|-------------------------------------------------------------------|----------------------|--------------------------------------------|-----------------------------------------------------|--------------------------------------------------------------|----------------------------------------|-----------------------------------------------------|-------------------|---------------------|---------------------------------|---------------------------------|------------------|
| ZINC04252531 | 69.6814                                                             | 58.8549                                                           | Non-Mutagen          | Toxic                                      | 1.34461                                             | 1.60205                                                      | 128.234                                | 0.119915                                            | None              | Mild                | Degradable                      | 0.083727                        | 9.15815          |
| ZINC31154941 | 17.6526                                                             | 8.70416                                                           | Non-Mutagen          | Toxic                                      | 2.99297                                             | 1.54515                                                      | 40.8136                                | 0.047911                                            | Mild              | Severe              | Non-<br>Degradable              | 10.037                          | 5.54091          |
| ZINC35456730 | 26.9648                                                             | 4.35973                                                           | Non-Mutagen          | Toxic                                      | 1.43456                                             | 1.02705                                                      | 246.749                                | 0.058777                                            | None              | Severe              | Degradable                      | 0.274372                        | 12.58            |
| ZINC03874669 | 22.49                                                               | 10.8606                                                           | Non-Mutagen          | Toxic                                      | 5.90786                                             | 2.41508                                                      | 79.396                                 | 0.091103                                            | None              | Severe              | Degradable                      | 0.150494                        | 7.57431          |
| ZINC31157223 | 79.0705                                                             | 48.1081                                                           | Non-Mutagen          | Toxic                                      | 4.94696                                             | 1.20099                                                      | 99.0829                                | 0.05374                                             | None              | Mild                | Degradable                      | 0.008355                        | 1.50118          |
| ZINC13404388 | 10.0204                                                             | 13.6469                                                           | Non-Mutagen          | Toxic                                      | 1.90891                                             | 2.55866                                                      | 59.2914                                | 0.103979                                            | None              | Severe              | Degradable                      | 0.315966                        | 17.2369          |
| ZINC31168395 | 7.81565                                                             | 8.08092                                                           | Non-Mutagen          | Toxic                                      | 2.27186                                             | 4.5905                                                       | 73.161                                 | 0.170122                                            | None              | Severe              | Degradable                      | 1.17299                         | 33.0082          |
| ZINC13404384 | 10.0204                                                             | 13.6469                                                           | Non-Mutagen          | Toxic                                      | 1.90891                                             | 2.55866                                                      | 59.2914                                | 0.103979                                            | None              | Severe              | Degradable                      | 0.315966                        | 17.2369          |
| ZINC37538744 | 20.3629                                                             | 7.15743                                                           | Non-Mutagen          | Toxic                                      | 4.37715                                             | 0.861081                                                     | 134.88                                 | 0.030308                                            | None              | Severe              | Degradable                      | 0.008699                        | 2.19146          |

|              |         |          |             |       |          |          |         |          |      |          |                |          |          |
|--------------|---------|----------|-------------|-------|----------|----------|---------|----------|------|----------|----------------|----------|----------|
| ZINC31155964 | 12.5847 | 20.6939  | Non-Mutagen | Toxic | 3.77256  | 2.39203  | 147.423 | 0.175244 | None | Severe   | Non-Degradable | 0.007458 | 0.32656  |
| ZINC31155960 | 12.5847 | 20.6939  | Non-Mutagen | Toxic | 3.77256  | 2.39203  | 147.423 | 0.175244 | None | Severe   | Non-Degradable | 0.007458 | 0.32656  |
| ZINC31155572 | 17.0777 | 3.50331  | Non-Mutagen | Toxic | 8.02132  | 3.84466  | 226.858 | 0.228746 | None | Severe   | Non-Degradable | 0.040068 | 0.393623 |
| ZINC13424696 | 11.0715 | 26.8242  | Non-Mutagen | Toxic | 2.50058  | 3.8423   | 26.3121 | 0.043173 | None | Mild     | Degradable     | 0.116181 | 4.93771  |
| ZINC13404408 | 12.0324 | 11.972   | Non-Mutagen | Toxic | 2.8932   | 3.84715  | 55.8623 | 0.149216 | None | Severe   | Degradable     | 0.566452 | 12.5948  |
| ZINC35454596 | 69.3455 | 27.1667  | Non-Mutagen | Toxic | 10.7402  | 5.26155  | 21.8685 | 0.108787 | Mild | Moderate | Degradable     | 1.73957  | 4.62572  |
| ZINC35454599 | 69.3455 | 27.1667  | Non-Mutagen | Toxic | 10.7402  | 5.26155  | 21.8685 | 0.108787 | Mild | Moderate | Degradable     | 1.73957  | 4.62572  |
| ZINC35454588 | 69.3455 | 27.1667  | Non-Mutagen | Toxic | 10.7402  | 5.26155  | 21.8685 | 0.108787 | Mild | Moderate | Degradable     | 1.73957  | 4.62572  |
| ZINC35454592 | 69.3455 | 27.1667  | Non-Mutagen | Toxic | 10.7402  | 5.26155  | 21.8685 | 0.108787 | Mild | Moderate | Degradable     | 1.73957  | 4.62572  |
| ZINC04349223 | 7.34201 | 3.97989  | Mutagen     | Toxic | 1.62863  | 3.47307  | 37.364  | 0.0999   | None | Moderate | Degradable     | 1.38391  | 4.15102  |
| ZINC35455254 | 9.65831 | 42.967   | Non-Mutagen | Toxic | 0.694201 | 1.07197  | 17.7249 | 0.010674 | Mild | None     | Degradable     | 0.305931 | 5.67392  |
| ZINC35271371 | 25.0999 | 2.76499  | Non-Mutagen | Toxic | 3.81898  | 0.840288 | 246.447 | 0.073495 | Mild | Severe   | Degradable     | 0.210485 | 2.52601  |
| ZINC04887566 | 8.13962 | 0.941567 | Non-Mutagen | Toxic | 3.17515  | 6.35874  | 26.4469 | 0.070434 | None | None     | Degradable     | 1.55141  | 1.94     |

|              |         |          |             |       |         |          |         |          |      |        |                |          |          |
|--------------|---------|----------|-------------|-------|---------|----------|---------|----------|------|--------|----------------|----------|----------|
| ZINC04887568 | 8.13962 | 0.941567 | Non-Mutagen | Toxic | 3.17515 | 6.35874  | 26.4469 | 0.070434 | None | None   | Degradable     | 1.55141  | 1.94     |
| ZINC35455036 | 75.9842 | 1.11727  | Non-Mutagen | Toxic | 3.29896 | 0.774151 | 253.108 | 0.055891 | Mild | None   | Degradable     | 1.43767  | 13.9051  |
| ZINC31167460 | 65.8207 | 9.01344  | Non-Mutagen | Toxic | 1.38715 | 1.36179  | 68.5541 | 0.053914 | None | Mild   | Non-Degradable | 0.263736 | 17.2781  |
| ZINC35464471 | 65.8207 | 9.01344  | Non-Mutagen | Toxic | 1.38715 | 1.36179  | 68.5541 | 0.053914 | None | Mild   | Non-Degradable | 0.263736 | 17.2781  |
| ZINC31167451 | 65.8207 | 9.01344  | Non-Mutagen | Toxic | 1.38715 | 1.36179  | 68.5541 | 0.053914 | None | Mild   | Non-Degradable | 0.263736 | 17.2781  |
| ZINC31167448 | 65.8207 | 9.01344  | Non-Mutagen | Toxic | 1.38715 | 1.36179  | 68.5541 | 0.053914 | None | Mild   | Non-Degradable | 0.263736 | 17.2781  |
| ZINC31167456 | 65.8207 | 9.01344  | Non-Mutagen | Toxic | 1.38715 | 1.36179  | 68.5541 | 0.053914 | None | Mild   | Non-Degradable | 0.263736 | 17.2781  |
| ZINC67912024 | 8.40892 | 4.21256  | Non-Mutagen | Toxic | 4.24621 | 1.14774  | 41.7276 | 0.058482 | Mild | Severe | Degradable     | 0.608756 | 3.9021   |
| ZINC13451185 | 92.4644 | 4.39451  | Non-Mutagen | Toxic | 1.40307 | 0.9538   | 19.035  | 0.021904 | None | Mild   | Degradable     | 0.034027 | 0.650872 |
| ZINC72320586 | 575.771 | 14.0133  | Non-Mutagen | Toxic | 15.4018 | 0.385415 | 140.479 | 0.308132 | None | None   | Degradable     | 0.170306 | 6.53117  |
| ZINC72320588 | 575.771 | 14.0133  | Non-Mutagen | Toxic | 15.4018 | 0.385415 | 140.479 | 0.308132 | None | None   | Degradable     | 0.170306 | 6.53117  |
| ZINC67902596 | 3.98104 | 3.98096  | Mutagen     | Toxic | 2.2648  | 1.96041  | 7.70972 | 0.096909 | Mild | Severe | Degradable     | 5.42036  | 7.09464  |

|              |         |         |             |       |          |          |         |          |          |          |            |          |          |
|--------------|---------|---------|-------------|-------|----------|----------|---------|----------|----------|----------|------------|----------|----------|
| ZINC72320007 | 28.7861 | 3.70919 | Non-Mutagen | Toxic | 10.8624  | 1.11336  | 24.1738 | 0.030159 | Mild     | Moderate | Degradable | 0.612987 | 2.71009  |
| ZINC35455227 | 18.5022 | 2.51041 | Non-Mutagen | Toxic | 15.6244  | 1.07101  | 148.967 | 0.118608 | Mild     | Severe   | Degradable | 0.023542 | 0.508021 |
| ZINC35455235 | 18.5022 | 2.51041 | Non-Mutagen | Toxic | 15.6244  | 1.07101  | 148.967 | 0.118608 | Mild     | Severe   | Degradable | 0.023542 | 0.508021 |
| ZINC67912601 | 20.9066 | 32.2917 | Non-Mutagen | Toxic | 2.41083  | 1.41083  | 22.4275 | 0.059894 | Mild     | None     | Degradable | 0.179717 | 4.63261  |
| ZINC67912606 | 20.9066 | 32.2917 | Non-Mutagen | Toxic | 2.41083  | 1.41083  | 22.4275 | 0.059894 | Mild     | None     | Degradable | 0.179717 | 4.63261  |
| ZINC67913702 | 15.2265 | 23.2325 | Non-Mutagen | Toxic | 0.434574 | 0.459913 | 8.82423 | 0.007355 | Mild     | Moderate | Degradable | 0.280791 | 2.74662  |
| ZINC35465647 | 48.183  | 161.257 | Non-Mutagen | Toxic | 3.20907  | 1.69036  | 111.934 | 0.045535 | Moderate | None     | Degradable | 0.000121 | 0.419765 |
| ZINC72320594 | 14.2565 | 1.82097 | Non-Mutagen | Toxic | 8.01423  | 0.573214 | 199.942 | 0.082339 | Mild     | Severe   | Degradable | 0.224036 | 1.56435  |
| ZINC72320595 | 14.2565 | 1.82097 | Non-Mutagen | Toxic | 8.01423  | 0.573214 | 199.942 | 0.082339 | Mild     | Severe   | Degradable | 0.224036 | 1.56435  |
| ZINC72320597 | 14.2565 | 1.82097 | Non-Mutagen | Toxic | 8.01423  | 0.573214 | 199.942 | 0.082339 | Mild     | Severe   | Degradable | 0.224036 | 1.56435  |
| ZINC72320596 | 14.2565 | 1.82097 | Non-Mutagen | Toxic | 8.01423  | 0.573214 | 199.942 | 0.082339 | Mild     | Severe   | Degradable | 0.224036 | 1.56435  |
| ZINC67910363 | 7.93947 | 1.81409 | Non-Mutagen | Toxic | 5.1196   | 0.605959 | 86.0014 | 0.038287 | Mild     | Severe   | Degradable | 0.155868 | 1.23559  |
| ZINC38143583 | 16.2005 | 2.12237 | Non-Mutagen | Toxic | 5.2689   | 1.36735  | 62.1922 | 0.037211 | Mild     | None     | Degradable | 0.008392 | 2.26367  |
| ZINC38143581 | 16.2005 | 2.12237 | Non-Mutagen | Toxic | 5.2689   | 1.36735  | 62.1922 | 0.037211 | Mild     | None     | Degradable | 0.008392 | 2.26367  |
| ZINC85341116 | 16.2005 | 2.12237 | Non-Mutagen | Toxic | 5.2689   | 1.36735  | 62.1922 | 0.037211 | Mild     | None     | Degradable | 0.008392 | 2.26367  |

|              |         |          |             |       |         |          |         |          |          |          |                |          |          |
|--------------|---------|----------|-------------|-------|---------|----------|---------|----------|----------|----------|----------------|----------|----------|
| ZINC38143580 | 16.2005 | 2.12237  | Non-Mutagen | Toxic | 5.2689  | 1.36735  | 62.1922 | 0.037211 | Mild     | None     | Degradable     | 0.008392 | 2.26367  |
| ZINC67912507 | 11.6043 | 3.41078  | Non-Mutagen | Toxic | 1.10185 | 0.387106 | 23.7301 | 0.012693 | Mild     | None     | Degradable     | 0.01741  | 2.575    |
| ZINC67910645 | 87.2611 | 3.80584  | Non-Mutagen | Toxic | 11.4092 | 0.525397 | 19.1937 | 0.161848 | Mild     | Mild     | Degradable     | 0.578979 | 1.57282  |
| ZINC85340579 | 5.13669 | 0.429544 | Non-Mutagen | Toxic | 2.35208 | 0.791358 | 36.9411 | 0.084906 | None     | Moderate | Degradable     | 0.78033  | 0.495827 |
| ZINC77257082 | 5.3455  | 0.578995 | Non-Mutagen | Toxic | 7.52439 | 1.21209  | 8.65411 | 0.11207  | None     | Mild     | Non-Degradable | 4.1767   | 1.80417  |
| ZINC38139587 | 6.55699 | 0.487204 | Non-Mutagen | Toxic | 1.70472 | 0.566447 | 87.7859 | 0.044118 | Mild     | Mild     | Degradable     | 0.049654 | 0.44407  |
| ZINC67902744 | 18.294  | 15.6934  | Non-Mutagen | Toxic | 8.33225 | 2.10688  | 5.14746 | 0.222251 | None     | None     | Degradable     | 0.661296 | 1.81436  |
| ZINC67912012 | 14.5437 | 2.958    | Non-Mutagen | Toxic | 4.33803 | 0.861826 | 13.0763 | 0.030017 | Mild     | None     | Degradable     | 0.162476 | 1.89258  |
| ZINC33861425 | 2.91834 | 0.646121 | Non-Mutagen | Toxic | 27.1477 | 5.04098  | 12.598  | 0.145151 | None     | None     | Degradable     | 0.033904 | 0.557349 |
| ZINC67902892 | 2.81057 | 0.848466 | Non-Mutagen | Toxic | 3.24553 | 1.43267  | 22.6831 | 0.039401 | None     | Moderate | Degradable     | 0.79128  | 1.09705  |
| ZINC67913374 | 4.54224 | 6.73813  | Non-Mutagen | Toxic | 4.06941 | 3.45435  | 19.3757 | 0.089729 | Mild     | Severe   | Non-Degradable | 0.04343  | 0.103406 |
| ZINC70672772 | 68.8985 | 21.3189  | Non-Mutagen | Toxic | 4.60177 | 3.69439  | 9.0042  | 0.219997 | None     | Moderate | Degradable     | 0.029333 | 0.304376 |
| ZINC72320143 | 24.8795 | 3.44004  | Non-Mutagen | Toxic | 1.72121 | 1.58236  | 246.937 | 0.076542 | Moderate | None     | Degradable     | 1.21E-05 | 0.104321 |
| ZINC72320145 | 24.8795 | 3.44004  | Non-Mutagen | Toxic | 1.72121 | 1.58236  | 246.937 | 0.076542 | Moderate | None     | Degradable     | 1.21E-05 | 0.104321 |

|              |         |           |             |       |         |          |         |          |          |          |                |          |          |
|--------------|---------|-----------|-------------|-------|---------|----------|---------|----------|----------|----------|----------------|----------|----------|
| ZINC72320142 | 24.8795 | 3.44004   | Non-Mutagen | Toxic | 1.72121 | 1.58236  | 246.937 | 0.076542 | Moderate | None     | Degradable     | 1.21E-05 | 0.104321 |
| ZINC67903086 | 4.05087 | 0.243604  | Non-Mutagen | Toxic | 5.91796 | 1.7991   | 29.3084 | 0.081602 | None     | Mild     | Degradable     | 4.08273  | 2.58184  |
| ZINC59816865 | 3.31067 | 0.359775  | Non-Mutagen | Toxic | 5.0698  | 2.73912  | 9.01174 | 0.054298 | None     | Moderate | Degradable     | 7.30341  | 0.513099 |
| ZINC70691533 | 3.31067 | 0.359775  | Non-Mutagen | Toxic | 5.0698  | 2.73912  | 9.01174 | 0.054298 | None     | Moderate | Degradable     | 7.30341  | 0.513099 |
| ZINC08234294 | 4.05087 | 0.243604  | Non-Mutagen | Toxic | 5.91796 | 1.7991   | 29.3084 | 0.081602 | None     | Mild     | Degradable     | 4.08273  | 2.58184  |
| ZINC67910222 | 3.27614 | 1.37765   | Non-Mutagen | Toxic | 7.42822 | 2.76496  | 33.0286 | 0.265995 | None     | Severe   | Non-Degradable | 0.06142  | 0.139358 |
| ZINC08143568 | 6.05684 | 0.0509088 | Non-Mutagen | Toxic | 2.89041 | 0.764033 | 39.6325 | 0.050189 | None     | Mild     | Degradable     | 1.56319  | 1.71086  |
| ZINC67912005 | 6.19456 | 0.812267  | Non-Mutagen | Toxic | 8.71191 | 3.10306  | 7.81091 | 0.046176 | Mild     | Mild     | Degradable     | 0.093304 | 0.325256 |
| ZINC67902708 | 22.8599 | 12.7737   | Non-Mutagen | Toxic | 1.78829 | 2.54931  | 120.637 | 0.11033  | Moderate | None     | Degradable     | 2.76E-05 | 0.214567 |
| ZINC67902702 | 22.8599 | 12.7737   | Non-Mutagen | Toxic | 1.78829 | 2.54931  | 120.637 | 0.11033  | Moderate | None     | Degradable     | 2.76E-05 | 0.214567 |
| ZINC38143675 | 17.0195 | 2.29434   | Non-Mutagen | Toxic | 20.9397 | 1.33449  | 8.11417 | 0.196993 | None     | None     | Degradable     | 0.450839 | 1.95655  |
| ZINC38143673 | 17.0195 | 2.29434   | Non-Mutagen | Toxic | 20.9397 | 1.33449  | 8.11417 | 0.196993 | None     | None     | Degradable     | 0.450839 | 1.95655  |
| ZINC38143676 | 17.0195 | 2.29434   | Non-Mutagen | Toxic | 20.9397 | 1.33449  | 8.11417 | 0.196993 | None     | None     | Degradable     | 0.450839 | 1.95655  |
| ZINC38143674 | 17.0195 | 2.29434   | Non-Mutagen | Toxic | 20.9397 | 1.33449  | 8.11417 | 0.196993 | None     | None     | Degradable     | 0.450839 | 1.95655  |

|              |          |          |             |       |         |          |         |          |      |          |                |          |           |
|--------------|----------|----------|-------------|-------|---------|----------|---------|----------|------|----------|----------------|----------|-----------|
| ZINC67902872 | 4.06204  | 0.646873 | Non-Mutagen | Toxic | 7.55963 | 3.02237  | 13.5263 | 0.077166 | Mild | Severe   | Degradable     | 0.081162 | 0.556794  |
| ZINC49898792 | 4.06204  | 0.646873 | Non-Mutagen | Toxic | 7.55963 | 3.02237  | 13.5263 | 0.077166 | Mild | Severe   | Degradable     | 0.081162 | 0.556794  |
| ZINC08234345 | 4.06204  | 0.646873 | Non-Mutagen | Toxic | 12.9722 | 3.02237  | 11.1012 | 0.08879  | Mild | Mild     | Degradable     | 0.081162 | 0.526095  |
| ZINC67902876 | 2.53636  | 1.6954   | Non-Mutagen | Toxic | 2.40562 | 2.87937  | 3.5463  | 0.120496 | None | Moderate | Degradable     | 4.29934  | 0.635534  |
| ZINC67912153 | 7.13047  | 0.778172 | Non-Mutagen | Toxic | 9.45009 | 4.16567  | 8.06655 | 0.042773 | Mild | Severe   | Degradable     | 0.321934 | 0.519982  |
| ZINC49781425 | 2.78678  | 2.18562  | Non-Mutagen | Toxic | 2.74898 | 2.78764  | 3.484   | 0.110585 | None | Moderate | Degradable     | 5.2484   | 0.727117  |
| ZINC33861449 | 0.884806 | 0.139494 | Non-Mutagen | Toxic | 1.88032 | 5.3752   | 9.96899 | 0.107901 | None | None     | Degradable     | 0.304395 | 0.600581  |
| ZINC67910683 | 4.77223  | 0.286416 | Non-Mutagen | Toxic | 4.65276 | 0.864701 | 11.648  | 0.06716  | None | Mild     | Degradable     | 1.30378  | 0.513892  |
| ZINC67910687 | 4.77223  | 0.286416 | Non-Mutagen | Toxic | 4.65276 | 0.864701 | 11.648  | 0.06716  | None | Mild     | Degradable     | 1.30378  | 0.513892  |
| ZINC67910690 | 4.77223  | 0.286416 | Non-Mutagen | Toxic | 4.65276 | 0.864701 | 11.648  | 0.06716  | None | Mild     | Degradable     | 1.30378  | 0.513892  |
| ZINC67902500 | 6.9208   | 0.16944  | Non-Mutagen | Toxic | 4.17245 | 0.606871 | 25.6766 | 0.016362 | Mild | None     | Degradable     | 0.206598 | 0.35914   |
| ZINC67911949 | 11.8383  | 3.85487  | Non-Mutagen | Toxic | 7.20504 | 0.505048 | 12.5004 | 0.047896 | Mild | None     | Degradable     | 0.00033  | 0.0703614 |
| ZINC77269667 | 4.38983  | 3.8934   | Non-Mutagen | Toxic | 7.2801  | 2.58198  | 13.4248 | 0.03111  | Mild | Severe   | Degradable     | 0.0022   | 0.19497   |
| ZINC67910405 | 4.96145  | 15.7168  | Non-Mutagen | Toxic | 12.6361 | 1.31412  | 4.37969 | 0.184455 | Mild | Mild     | Non-Degradable | 0.000267 | 0.011086  |

|              |         |          |             |       |         |         |         |          |      |          |                |          |           |
|--------------|---------|----------|-------------|-------|---------|---------|---------|----------|------|----------|----------------|----------|-----------|
| ZINC67903541 | 5.9924  | 7.3021   | Non-Mutagen | Toxic | 4.78204 | 1.39205 | 3.85974 | 0.301067 | None | Moderate | Non-Degradable | 0.000313 | 0.0200298 |
| ZINC67903538 | 5.9924  | 7.3021   | Non-Mutagen | Toxic | 4.78204 | 1.39205 | 3.85974 | 0.301067 | None | Moderate | Non-Degradable | 0.000313 | 0.0200298 |
| ZINC79210091 | 5.99396 | 0.382049 | Non-Mutagen | Toxic | 2.39611 | 4.10972 | 6.881   | 0.129576 | None | Mild     | Degradable     | 0.003293 | 0.0164177 |
| ZINC79210094 | 5.99396 | 0.382049 | Non-Mutagen | Toxic | 2.39611 | 4.10972 | 6.881   | 0.129576 | None | Mild     | Degradable     | 0.003293 | 0.0164177 |
| ZINC67902657 | 1.53623 | 2.6866   | Non-Mutagen | Toxic | 7.50652 | 4.2508  | 1.97767 | 0.120862 | Mild | Severe   | Non-Degradable | 0.136052 | 0.0278864 |
